# Supplementary material for: Assembly and substrate recognition of curli biogenesis system
Source: PubMed Central journal article supplement (PMC6957492; doi:10.1038/s41467-019-14145-7), 2020-01-13
Supplement: 41467_2019_14145_MOESM1_ESM.pdf [file 41467_2019_14145_MOESM1_ESM.pdf]

## **Supplementary Information**

### **Assembly and Substrate Recognition of Curli Biogenesis System**

Yan et al.

**Supplementary Table 1.** Primer sequences used for experiments.

| <b>Constructs</b>                     | <b>Primers</b>       | <b>Sequences</b>                                                                      |
|---------------------------------------|----------------------|---------------------------------------------------------------------------------------|
| <b>CsgEFG_Cstrep</b>                  | Forward_end          | GTGCTGCATATGAAACGTTATTTACGCTGGATTG<br>TG                                              |
|                                       | Reverse_end          | CCTTCAGGATCCTTATTTTTCGAACTGCGGGTGG<br>CTCCAAGCGCTGGATTCCGGTGAACCGACATG<br>TGGCGGTATTC |
| <b>CsgG_Cstrep</b>                    | Forward_end          | GTGCTGCATATGCAGCGCTTATTTCTTTTGG                                                       |
|                                       | Reverse_end          | CCTTCAGGATCCTTATTTTTCGAACTGCGGGTGG<br>CTCCAAGCGCTGGATTCCGGTGAACCGACAT                 |
| <b>MBP_Chis</b>                       | Forward_end          | GTGCTGCATATGAAAATCGAAGAAGGTAAACTG<br>GTAATC                                           |
|                                       | Reverse_end          | CCTTCAGGATCCTTAGTGATGATGATGATGATG<br>AGCGCTAGTCTGCGCGTCTTTCAG                         |
| <b>CsgF-<br/>MBP_Chis</b>             | Forward_end          | GTGCTGCATATGGGAACCATGACTTTCCAGTTC                                                     |
|                                       | Reverse_end          | CCTTCAGGATCCTTAGTGATGATGATGATGATG<br>AGCGCTAGTCTGCGCGTCTTTCAG                         |
|                                       | Forward_intermediate | CAAATAACTCAACCGATTTTAAAATCGAAGAA<br>GGTAAAC                                           |
|                                       | Reverse_intermediate | GTTTACCTTCTTCGATTTTAAAATCGGTTGAGTTA<br>TTTTG                                          |
| <b>CsgF<sub>N</sub>-<br/>MBP_Chis</b> | Forward_end          | GTGCTGCATATGGGAACCATGACTTTCCAGTTC                                                     |
|                                       | Reverse_end          | CCTTCAGGATCCTTAGTGATGATGATGATGATG<br>AGCGCTAGTCTGCGCGTCTTTCAG                         |
|                                       | Forward_intermediate | CTTTATAAAGATCCGAGCAAATCGAAGAAGG<br>TAAACTG                                            |
|                                       | Reverse_intermediate | CAGTTTACCTTCTTCGATTTTGCTCGGATCTTTAT<br>AAGAG                                          |

| <b>Constructs</b>                                 | <b>Primers</b>       | <b>Sequences</b>                                              |
|---------------------------------------------------|----------------------|---------------------------------------------------------------|
| <b>CsgF<sub>c</sub>-<br/>MBP<sub>-</sub>Chis</b>  | Forward_end          | GTGCTGCATATGTATAACGATGACTTTGGTATTG<br>AAAC                    |
|                                                   | Reverse_end          | CCTTCAGGATCCTTAGTGATGATGATGATGATG<br>AGCGCTAGTCTGCGCGTCTTTCAG |
|                                                   | Forward_intermediate | CAAATAACTCAACCGATTTTAAAATCGAAGAA<br>GGTAAAC                   |
|                                                   | Reverse_intermediate | GTTTACCTTCTTCGATTTTAAAATCGGTTGAGTTA<br>TTTTG                  |
| <b>MBP<sub>-</sub>Nstrep</b>                      | Forward_end          | GTGCTGCATATGTGGAGCCACCCGCAGTTCGAA<br>AAAAGCGCTAAAATCGAAGAAGG  |
|                                                   | Reverse_end          | CCTTCAGGATCCTTAAGTCTGCGCGTCTTTCAGG<br>GCTTC                   |
| <b>MBP<sub>-</sub><br/>CsgF<sub>N</sub>Nstrep</b> | Forward_end          | GTGCTGCATATGTGGAGCCACCCGCAGTTCGAA<br>AAAAGCGCTAAAATCGAAGAAGG  |
|                                                   | Reverse_end          | CCTTCAGGATCCTTAAAATCGGTTGAGTTATTT<br>TG                       |
|                                                   | Forward_intermediate | CTGAAAGACGCGCAGACTAGCGCTGGAACCAT<br>GACTTTCC                  |
|                                                   | Reverse_intermediate | GGAAAGTCATGGTTCAGCGCTAGTCTGCGCGT<br>CTTTCAG                   |
| <b>MBP<sub>-</sub><br/>CsgF<sub>N</sub>Nstrep</b> | Forward_end          | GTGCTGCATATGTGGAGCCACCCGCAGTTCGAA<br>AAAAGCGCTAAAATCGAAGAAGG  |
|                                                   | Reverse_end          | CCTTCAGGATCCTTAGCTCGGATCTTATAAGAG                             |
|                                                   | Forward_intermediate | CTGAAAGACGCGCAGACTAGCGCTGGAACCAT<br>GACTTTCC                  |
|                                                   | Reverse_intermediate | GGAAAGTCATGGTTCAGCGCTAGTCTGCGCGT<br>CTTTCAG                   |

| <b>Constructs</b>                       | <b>Primers</b>       | <b>Sequences</b>                                              |
|-----------------------------------------|----------------------|---------------------------------------------------------------|
| <b>MBP-<br/>CsgF<sub>c</sub>_Nstrep</b> | Forward_end          | GTGCTGCATATGTGGAGCCACCCGCAGTTCGAA<br>AAAAGCGCTAAAATCGAAGAAGG  |
|                                         | Reverse_end          | CCTTCAGGATCCTTAAAAATCGGTTGAGTTATTT<br>TG                      |
|                                         | Forward_intermediate | CTGAAAGACGCGCAGACTAGCGCTTATAACGAT<br>GACTTTGG                 |
|                                         | Reverse_intermediate | CCAAAGTCATCGTTATAAGCGCTAGTCTGCGCG<br>TCTTTCAG                 |
| <b>CsgB-<br/>MBP_Chisflag</b>           | Forward_end          | GTGCTGCATATGGCAGGTTATGATTTAGCT                                |
|                                         | Reverse_end-1        | CTTGTAATCAGCGCTGTGATGATGATGATGATG<br>AGCGCTAGTCTGCGCGTCTTTCAG |
|                                         | Reverse_end-2        | CCTTCAGGATCCTTACTTATCGTCGTCATCCTTG<br>TAATCAGCGCTGTGATGATG    |
|                                         | Forward_intermediate | CTATTCGCGTGACACAACGTAGCGCTAAAATCG<br>AAGAAGGTAAAC             |
|                                         | Reverse_intermediate | GTTTACCTTCTTCGATTTTAGCGCTACGTTGTGTC<br>ACGCGAATAG             |
| <b>MBP-<br/>CsgB_Nstrep</b>             | Forward_end          | GTGCTGCATATGTGGAGCCACCCGCAGTTCGAA<br>AAAAGCGCTAAAATCGAAGAAGG  |
|                                         | Reverse_end          | CCTTCAGGATCCTTATTAACGTTGTGTCACGCGA<br>ATAGC                   |
|                                         | Forward_intermediate | CTGAAAGACGCGCAGACTGCAGGTTATGATTTA<br>GCT                      |
|                                         | Reverse_intermediate | AGCTAAATCATAACCTGCAGTCTGCGCGTCTTTC<br>AG                      |

| <b>Constructs</b>                                   | <b>Primers</b>       | <b>Sequences</b>                                               |
|-----------------------------------------------------|----------------------|----------------------------------------------------------------|
| <b>CsgA-<br/>MBP_Chisflag</b>                       | Forward_end          | GTGCTGCATATGGGTGTTGTTCCCTCAGTACG<br>GC                         |
|                                                     | Reverse_end          | CCTTCAGGATCCTTACTTATCGTCGTCATCCT<br>TGTAATCAGCGCTGTGATGATG     |
|                                                     | Forward_intermediate | GCGACCGCTCATCAGTACGGCAAATCGAA<br>GAAGGTAAAC                    |
|                                                     | Reverse_intermediate | GTTTACCTTCTTCGATTTTGCCGTACTIONGATGA<br>GCGGTCCG                |
| <b>CsgF<sub>N</sub>-<br/>MBP_Chisflag</b>           | Forward_end          | GTGCTGCATATGGGAACCATGACTTTCCAGT<br>TC                          |
|                                                     | Reverse_end          | CCTTCAGGATCCTTACTTATCGTCGTCATCCT<br>TGTAATCAGCGCTGTGATGATG     |
|                                                     | Forward_intermediate | CTCTATAAAGATCCGAGCAAATCGAAGAA<br>GGTAAACTG                     |
|                                                     | Reverse_intermediate | CAGTTTACCTTCTTCGATTTTGCTCGGATCTT<br>TATAAGAG                   |
| <b>MBP_Chisflag</b>                                 | Forward_end          | GTGCTGCATATGAAAATCGAAGAAGGTAAA<br>CTGGTAATC                    |
|                                                     | Reverse_end          | CCTTCAGGATCCTTACTTATCGTCGTCATCCT<br>TGTAATCAGCGCTGTGATGATG     |
| <b>CsgF<sub>N</sub>-<br/>MBP_Chisflag<br/>(R8A)</b> | Forward_end          | GTGCTGCATATGGGAACCATGACTTTCCAGT<br>TCGCGAATCCAACTTTGGTGGTAACCC |
|                                                     | Reverse_end          | CCTTCAGGATCCTTACTTATCGTCGTCATCCT<br>TGTAATCAGCGCTGTGATGATG     |
| <b>CsgF<sub>N</sub>-<br/>MBP_Chisflag<br/>(N9A)</b> | Forward_end          | GTGCTGCATATGGGAACCATGACTTTCCAGT<br>TCCGTGCGCCAACTTTGGTGGTAACCC |
|                                                     | Reverse_end          | CCTTCAGGATCCTTACTTATCGTCGTCATCCT<br>TGTAATCAGCGCTGTGATGATG     |

| <b>Constructs</b>                                    | <b>Primers</b> | <b>Sequences</b>                                                        |
|------------------------------------------------------|----------------|-------------------------------------------------------------------------|
| <b>CsgF<sub>N</sub>-<br/>MBP_Chisflag<br/>(N11A)</b> | Forward_end    | GTGCTGCATATGGGAACCATGACTTTCCAGTTCCG<br>TAATCCAGCGTTTGGTGGTAACCC         |
|                                                      | Reverse_end    | CCTTCAGGATCCTTACTTATCGTCGTCATCCTTGTA<br>ATCAGCGCTGTGATGATG              |
| <b>CsgF<sub>N</sub>-<br/>MBP_Chisflag<br/>(F5D)</b>  | Forward_end    | GTGCTGCATATGGGAACCATGACTGATCAGTTCC<br>GTAATCCAAACTTTGGTGGTAACCCAAATAATG |
|                                                      | Reverse_end    | CCTTCAGGATCCTTACTTATCGTCGTCATCCTTGTA<br>ATCAGCGCTGTGATGATG              |
| <b>CsgF<sub>N</sub>-<br/>MBP_Chisflag<br/>(F7D)</b>  | Forward_end    | GTGCTGCATATGGGAACCATGACTTTCCAGGATC<br>GTAATCCAAACTTTGGTGGTAACCCAAATAATG |
|                                                      | Reverse_end    | CCTTCAGGATCCTTACTTATCGTCGTCATCCTTGTA<br>ATCAGCGCTGTGATGATG              |
| <b>CsgF<sub>N</sub>-<br/>MBP_Chisflag<br/>(F12D)</b> | Forward_end    | GTGCTGCATATGGGAACCATGACTTTCCAGTTCCG<br>TAATCCAAACGATGGTGGTAACCCAAATAATG |
|                                                      | Reverse_end    | CCTTCAGGATCCTTACTTATCGTCGTCATCCTTGTA<br>ATCAGCGCTGTGATGATG              |
| <b>CsgF<sub>N</sub>-<br/>MBP_Chisflag<br/>(F21D)</b> | Forward_end-1  | GTGCTGCATATGGGAACCATGACTTTCCAGTTCCG<br>TAATCCAAACTTTGGTGGTAAC           |
|                                                      | Forward_end-2  | CCAAACTTTGGTGGTAACCCAAATAATGGCGCTG<br>ATTTATTAATAGCGCTCAGGCC            |
|                                                      | Reverse_end    | CCTTCAGGATCCTTACTTATCGTCGTCATCCTTGTA<br>ATCAGCGCTGTGATGATG              |
| <b>CsgF<sub>N</sub>-<br/>MBP_Chisflag<br/>(L22D)</b> | Forward_end-1  | GTGCTGCATATGGGAACCATGACTTTCCAGTTCCG<br>TAATCCAAACTTTGGTGGTAAC           |
|                                                      | Forward_end-2  | CCAAACTTTGGTGGTAACCCAAATAATGGCGCTTT<br>TGATTTAAATAGCGCTCAGGCC           |
|                                                      | Reverse_end    | CCTTCAGGATCCTTACTTATCGTCGTCATCCTTGTA<br>ATCAGCGCTGTGATGATG              |

| <b>Constructs</b>                                    | <b>Primers</b>       | <b>Sequences</b>                                                    |
|------------------------------------------------------|----------------------|---------------------------------------------------------------------|
| <b>CsgF<sub>N</sub>-<br/>MBP_Chisflag<br/>(L23D)</b> | Forward_end-1        | GTGCTGCATATGGGAACCATGACTTTCCAGTTC<br>CGTAATCCAAACTTTGGTGGTAAC       |
|                                                      | Forward_end-2        | CCAAACTTTGGTGGTAACCCAAATAATGGCGCT<br>TTTTAGATAATAGCGCTCAGGCC        |
|                                                      | Reverse_end          | CCTTCAGGATCCTTACTTATCGTCGTCATCCTTG<br>TAATCAGCGCTGTGATGATG          |
| <b>CsgE-Cstrep</b>                                   | Forward_end          | GTGCTGCATATGGCCGTTGAGGTAGAAGTCCCG<br>GGA                            |
|                                                      | Reverse_end          | CCTTCAGGATCCTTATTTTTCGAACTGCGGGTGG<br>CTCCAAGCGCTGAATTCATCATGCGC    |
| <b>CsgA<sub>N22</sub>-<br/>MBP_Chisflag</b>          | Forward_end          | GTGCTGCATATGGGTGTTGTTCCCTCAGTACGGC                                  |
|                                                      | Reverse_end          | CCTTCAGGATCCTTACTTATCGTCGTCATCCTTG<br>TAATCAGCGCTGTGATGATG          |
|                                                      | Forward_intermediate | GTAATAATAGCGGCCCAAATGGCAAATCGAA<br>GAAGGTAAAC                       |
|                                                      | Reverse_intermediate | GTTTACCTTCTTCGATTTTGCCATTTGGGCCGCT<br>ATTATTAC                      |
| <b>CsgA<sub>C1-5</sub>-<br/>MBP_Chisflag</b>         | Forward_end          | GTGCTGCATATGTCTGAGCTGAACATTTACCAGT<br>AC                            |
|                                                      | Reverse_end          | CCTTCAGGATCCTTACTTATCGTCGTCATCCTTG<br>TAATCAGCGCTGTGATGATG          |
| <b>CsgE-Chis</b>                                     | Forward_end          | GTGCTGCATATGGCCGTTGAGGTAGAAGTCCCG<br>GGA                            |
|                                                      | Reverse_end          | CCTTCAGGATCCTTAGTGATGATGATGATGATG<br>AGCGCTGAATTCATCATGCGCCAAATCGCC |

| <b>Constructs</b>                          | <b>Primers</b>       | <b>Sequences</b>                                                                  |
|--------------------------------------------|----------------------|-----------------------------------------------------------------------------------|
| <b>CsgA<sub>N22</sub>-<br/>PhoA-Cstrep</b> | Forward_end          | GTGCTGCATATGAAACTTTTAAAAGTAGCAGCAA<br>TTG                                         |
|                                            | Reverse_end          | CCTTCAGGATCCTTATTTTTCGAACTGCGGGTGGC<br>TCCAAGCGCTTTTCAGCCCCAGAGCGGC               |
|                                            | Forward_intermediate | GTAATAATAGCGGCCCAAATGTGACAAAAGCCCCG<br>GAC                                        |
|                                            | Reverse_intermediate | GTCCGGGCTTTTGTACATTTGGGCCGCTATTATT<br>AC                                          |
| <b>CsgEFG_Chis</b>                         | Forward_end          | GTGCTGCATATGAAACGTTATTTACGCTGGATTGT<br>G                                          |
|                                            | Reverse_end          | CCTTCAGGATCCTTAGTGATGATGATGATGATGA<br>GCGCTGGATTCCGGTGAACCGACATGTGGCGGT<br>ATTTAC |
| <b>CsgEFG_Chis<br/>flag</b>                | Forward_end          | GTGCTGCATATGAAACGTTATTTACGCTGGATTGT<br>G                                          |
|                                            | Reverse_end          | CCTTCAGGATCCTTACTTATCGTCGTCATCCTTGT<br>AATCAGCGTGATGATGATGATGATGAG                |
| <b>PhoA_Cstrep</b>                         | Forward_end          | GTGCTGCATATGAAACAAAGCACTATTGCACTGG<br>CACTC                                       |
|                                            | Reverse_end          | CCTTCAGGATCCTTATTTTTCGAACTGCGGGTGGC<br>TCCAAGCGCTTTTCAGCCCCAGAGCGGC               |
| <b>CsgA<sub>N6</sub>-<br/>PhoA-Cstrep</b>  | Forward_end          | GTGCTGCATATGAAACTTTTAAAAGTAGCAGCAA<br>TTG                                         |
|                                            | Reverse_end          | CCTTCAGGATCCTTATTTTTCGAACTGCGGGTGGC<br>TCCAAGCGCTTTTCAGCCCCAGAGCGGC               |
|                                            | Forward_intermediate | GCAGGTGTTGTTCTCAGTACGTGACAAAAGCCC<br>GGACACCA                                     |
|                                            | Reverse_intermediate | TGGTGTCCGGGCTTTTGTACGTAAGGGAACA<br>ACACCTGC                                       |



| <b>Constructs</b>       | <b>Primers</b>       | <b>Sequences</b>                               |
|-------------------------|----------------------|------------------------------------------------|
| <b>CsgF</b>             | Forward_end          | GTGCTGCATATGCGTGTCAAACATGCAGTAGTTC             |
|                         | Reverse_end          | CCTTCAGGATCCTTAAAAATCGGTTGAGTTATTTT<br>G       |
| <b>CsgF<sub>N</sub></b> | Forward_end          | GTGCTGCATATGCGTGTCAAACATGCAGTAGTTC             |
|                         | Reverse_end          | CCTTCAGGATCCTTAGCTCGGATCTTTATAAGAGT<br>TTTG    |
| <b>CsgF<sub>c</sub></b> | Forward_end          | GTGCTGCATATGCGTGTCAAACATGCAGTAGTTC             |
|                         | Reverse_end          | CCTTCAGGATCCTTAAAAATCGGTTGAGTTATTTT<br>G       |
|                         | Forward_intermediate | CCATTAAGTTGGGCTGGATATAACGATGACTTTG<br>GT       |
|                         | Reverse_intermediate | ACCAAAGTCATCGTTATATCCAGCCCACTTAATG<br>G        |
| <b>CsgF (N17D)</b>      | Forward_end          | GTGCTGCATATGCGTGTCAAACATGCAGTAGTTC             |
|                         | Reverse_end          | CCTTCAGGATCCTTAAAAATCGGTTGAGTTATTTT<br>G       |
|                         | Forward_intermediate | GGTGGTAACCCAGATAATGGCGCTTTTTTATTAAA<br>TAGC    |
|                         | Reverse_intermediate | AAAAGCGCCATTATCTGGGTTACCACCAAAGTTT<br>GGATTACG |
| <b>CsgF (N17Y)</b>      | Forward_end          | GTGCTGCATATGCGTGTCAAACATGCAGTAGTTC             |
|                         | Reverse_end          | CCTTCAGGATCCTTAAAAATCGGTTGAGTTATTTT<br>G       |
|                         | Forward_intermediate | GGTGGTAACCCATATAATGGCGCTTTTTTATTAAA<br>TAGC    |
|                         | Reverse_intermediate | AAAAGCGCCATTATATGGGTTACCACCAAAGTTT<br>GGATTACG |

| <b>Constructs</b>                    | <b>Primers</b>       | <b>Sequences</b>                              |
|--------------------------------------|----------------------|-----------------------------------------------|
| <b>CsgF (N17F)</b>                   | Forward_end          | GTGCTGCATATGCGTGTCAAACATGCAGTAGTTC            |
|                                      | Reverse_end          | CCTTCAGGATCCTTAAAAATCGGTTGAGTTATTTTG          |
|                                      | Forward_intermediate | AACTTTGGTGGTAACCCATTTAATGGCGCTTTTTTA<br>TTA   |
|                                      | Reverse_intermediate | TAATAAAAAAGCGCCATTAATGGGTTACCACCAA<br>AGTT    |
| <b>CsgF (N17R)</b>                   | Forward_end          | GTGCTGCATATGCGTGTCAAACATGCAGTAGTTC            |
|                                      | Reverse_end          | CCTTCAGGATCCTTAAAAATCGGTTGAGTTATTTTG          |
|                                      | Forward_intermediate | GGTGGTAACCCACGTAATGGCGCTTTTTTATTAAT<br>AGC    |
|                                      | Reverse_intermediate | AAAAGCGCCATTACGTGGGTTACCACCAAAGTTG<br>GATTACG |
| <b>CsgA</b>                          | Forward_end          | GTGCTGCATATGAAACTTTTAAAAGTAGCAGCAAT<br>TG     |
|                                      | Reverse_end          | CCTTCAGGATCCTTAGTACTGATGAGCGGTCGCG            |
| <b>CsgA (<math>\Delta</math>N22)</b> | Forward_end          | GTGCTGCATATGAAACTTTTAAAAGTAGCAGCAAT<br>TG     |
|                                      | Reverse_end          | CCTTCAGGATCCTTAGTACTGATGAGCGGTCGCG            |
|                                      | Forward_intermediate | CCGGTAGCGCTCTGGCATCTGAGCTGAACATTTAC           |
|                                      | Reverse_intermediate | GTAATGTTTCAGCTCAGATGCCAGAGCGCTACCGG           |
| <b>CsgA (V2D)</b>                    | Forward_end          | GTGCTGCATATGAAACTTTTAAAAGTAGCAGCAAT<br>TG     |
|                                      | Reverse_end          | CCTTCAGGATCCTTAGTACTGATGAGCGGTCGCG            |
|                                      | Forward_intermediate | GGTAGCGCTCTGGCAGGTGATGTTCTCAGTACGG<br>CGGCGGC |
|                                      | Reverse_intermediate | GCCGCCCGCTACTGAGGAACATCACCTGCCAGA<br>GCGTACC  |

| <b>Constructs</b>       | <b>Primers</b>       | <b>Sequences</b>                                |
|-------------------------|----------------------|-------------------------------------------------|
| <b>CsgA (V3D)</b>       | Forward_end          | GTGCTGCATATGAAACTTTTAAAAGTAGCAGCAATTG           |
|                         | Reverse_end          | CCTTCAGGATCCTTAGTACTGATGAGCGGTCGCG              |
|                         | Forward_intermediate | GGTAGCGCTCTGGCAGGTGTTGATCCTCAGTACGGC<br>GGCGGC  |
|                         | Reverse_intermediate | GCCGCCGCCGTAAGGATCAACACCTGCCAGAG<br>CGCTACC     |
| <b>CsgA (Q5A)</b>       | Forward_end          | GTGCTGCATATGAAACTTTTAAAAGTAGCAGCAATTG           |
|                         | Reverse_end          | CCTTCAGGATCCTTAGTACTGATGAGCGGTCGCG              |
|                         | Forward_intermediate | CTGGCAGGTGTTGTTCCCTGCGTACGGCGGCGGCGGT<br>AACCAC |
|                         | Reverse_intermediate | GTGGTTACCGCCGCCCGTACGCAGGAACAACAC<br>CTGCCAG    |
| <b>CsgA (Y6A)</b>       | Forward_end          | GTGCTGCATATGAAACTTTTAAAAGTAGCAGCAATTG           |
|                         | Reverse_end          | CCTTCAGGATCCTTAGTACTGATGAGCGGTCGCG              |
|                         | Forward_intermediate | CTGGCAGGTGTTGTTCCCTCAGGCGGCGGCGGCGG<br>TAACCAC  |
|                         | Reverse_intermediate | GTGGTTACCGCCGCCCGCCCGCTGAGGAACAACAC<br>CTGCCAG  |
| <b>CsgG</b>             | Forward_end          | GTGCTGCATATGCAGCGCTTATTTCTTTTGG                 |
|                         | Reverse_end          | CCTTCAGGATCCTTAGGATTCCGGTGAACCGACAT             |
| <b>CsgG<br/>(I121D)</b> | Forward_end          | GTGCTGCATATGCAGCGCTTATTTCTTTTGG                 |
|                         | Reverse_end          | CCTTCAGGATCCTTAGGATTCCGGTGAACCGACAT             |
|                         | Forward_intermediate | TCTTTAACGGCGGCAAATGATATGGTTGAAGTTTCG<br>ATT     |
|                         | Reverse_intermediate | AATCGAACCTTCAACCATATCATTTGCCGCCGTTAAA<br>GA     |

| <b>Constructs</b>                     | <b>Primers</b>       | <b>Sequences</b>                             |
|---------------------------------------|----------------------|----------------------------------------------|
| <b>CsgG (L172D)</b>                   | Forward_end          | GTGCTGCATATGCAGCGCTTATTTCTTTTGG              |
|                                       | Reverse_end          | CCTTCAGGATCCTTAGGATTCCGGTGAACC<br>GACAT      |
|                                       | Forward_intermediate | GTGAGTACCGGCGAGATCGATTCTTCGGTGA<br>ACACCAGT  |
|                                       | Reverse_intermediate | ACTGGTGTTACCCGAAGAATCGATCTCGCCG<br>GTA CTCAC |
| <b>CsgG (L236D)</b>                   | Forward_end          | GTGCTGCATATGCAGCGCTTATTTCTTTTGG              |
|                                       | Reverse_end          | CCTTCAGGATCCTTAGGATTCCGGTGAACC<br>GACAT      |
|                                       | Forward_intermediate | GATGGTATCGACCGTGGTGATTGGGATTGCG<br>AAAATAAA  |
|                                       | Reverse_intermediate | TTTATTTTGCAAATCCCAATCACCACGGTCG<br>ATACCATC  |
| <b>CsgG (W237D)</b>                   | Forward_end          | GTGCTGCATATGCAGCGCTTATTTCTTTTGG              |
|                                       | Reverse_end          | CCTTCAGGATCCTTAGGATTCCGGTGAACC<br>GACAT      |
|                                       | Forward_intermediate | GGTATCGACCGTGGTCTGGATGATTGCAAA<br>ATAAAGCA   |
|                                       | Reverse_intermediate | TGCTTTATTTTGCAAATCATCCAGACCACGGT<br>CGATACC  |
| <b>CsgG (<math>\Delta</math>W237)</b> | Forward_end          | GTGCTGCATATGCAGCGCTTATTTCTTTTGG              |
|                                       | Reverse_end          | CCTTCAGGATCCTTAGGATTCCGGTGAACC<br>GACAT      |
|                                       | Forward_intermediate | GGTATCGACCGTGGTCTGGATTGCAAAATA<br>AAGCA      |
|                                       | Reverse_intermediate | TGCTTTATTTTGCAAATCCAGACCACGGTCG<br>ATACC     |

| <b>Constructs</b>                        | <b>Primers</b>       | <b>Sequences</b>                         |
|------------------------------------------|----------------------|------------------------------------------|
| <b>CsgG (<math>\Delta</math>D238)</b>    | Forward_end          | GTGCTGCATATGCAGCGCTTATTTCTTTTGG          |
|                                          | Reverse_end          | CCTTCAGGATCCTTAGGATTCCGGTGGAACC<br>GACAT |
|                                          | Forward_intermediate | ATCGACCGTGGTCTGTGGTTGAAAATAAAG<br>CAGAA  |
|                                          | Reverse_intermediate | TTCTGCTTTATTTTGCAACCACAGACCACGGT<br>CGAT |
| <b>CsgG (<math>\Delta</math>T31)</b>     | Forward_end          | GTGCTGCATATGCAGCGCTTATTTCTTTTGG          |
|                                          | Reverse_end          | CCTTCAGGATCCTTAGGATTCCGGTGGAACC<br>GACAT |
|                                          | Forward_intermediate | ACCCATCTGCCAGCGCCGGTAAAATCTTTG<br>TTTCG  |
|                                          | Reverse_intermediate | CGAAACAAAGATTTTACCCGGCGCTGGCAG<br>ATGGGT |
| <b>CsgG (<math>\Delta</math>G32)</b>     | Forward_end          | GTGCTGCATATGCAGCGCTTATTTCTTTTGG          |
|                                          | Reverse_end          | CCTTCAGGATCCTTAGGATTCCGGTGGAACC<br>GACAT |
|                                          | Forward_intermediate | CATCTGCCAGCGCCGACGAAAATCTTTGTTT<br>CGGTA |
|                                          | Reverse_intermediate | TACCGAAACAAAGATTTTCGTGGCGCTGGC<br>AGATG  |
| <b>CsgG (<math>\Delta</math>107-110)</b> | Forward_end          | GTGCTGCATATGCAGCGCTTATTTCTTTTGG          |
|                                          | Reverse_end          | CCTTCAGGATCCTTAGGATTCCGGTGGAACC<br>GACAT |
|                                          | Forward_intermediate | GAAAACGGCACGGTTGCCATCCCGCTGCAA<br>TCTTTA |
|                                          | Reverse_intermediate | TAAAGATTGCAGCGGGATGGCAACCGTGCC<br>GTTTTC |

| <b>Constructs</b>  | <b>Primers</b>       | <b>Sequences</b>                          |
|--------------------|----------------------|-------------------------------------------|
| <b>CsgF (R8A)</b>  | Forward_end          | GTGCTGCATATGCGTGTCAAACATGCAGTAGTTC        |
|                    | Reverse_end          | CCTTCAGGATCCTTAAAAATCGGTTGAGTTATTTTG      |
|                    | Forward_intermediate | CATGACTTTCCAGTTCGCGAATCCAAACTTTGGTG<br>G  |
|                    | Reverse_intermediate | CATGACTTTCCAGTTCGCGAATCCAAACTTTGGTG<br>G  |
| <b>CsgF (N9A)</b>  | Forward_end          | GTGCTGCATATGCGTGTCAAACATGCAGTAGTTC        |
|                    | Reverse_end          | CCTTCAGGATCCTTAAAAATCGGTTGAGTTATTTTG      |
|                    | Forward_intermediate | GACTTTCCAGTTCGCGCAAACTTTGGTGTA<br>AC      |
|                    | Reverse_intermediate | GTTACCACCAAAGTTTGGCGCACGGAAGTGGAAA<br>GTC |
| <b>CsgF (N11A)</b> | Forward_end          | GTGCTGCATATGCGTGTCAAACATGCAGTAGTTC        |
|                    | Reverse_end          | CCTTCAGGATCCTTAAAAATCGGTTGAGTTATTTTG      |
|                    | Forward_intermediate | CAGTTCGTAATCCAGCGTTTGGTGGTAACCCAAA<br>T   |
|                    | Reverse_intermediate | ATTTGGGTTACCACCAAACGCTGGATTACGGAAGT<br>G  |
| <b>CsgF (F5D)</b>  | Forward_end          | GTGCTGCATATGCGTGTCAAACATGCAGTAGTTC        |
|                    | Reverse_end          | CCTTCAGGATCCTTAAAAATCGGTTGAGTTATTTTG      |
|                    | Forward_intermediate | GGCTGGAACCATGACTGATCAGTTCGTAATCCAA<br>AC  |
|                    | Reverse_intermediate | GTTTGGATTACGGAAGTATCAGTCATGGTTCCAG<br>CC  |
| <b>CsgF (F7D)</b>  | Forward_end          | GTGCTGCATATGCGTGTCAAACATGCAGTAGTTC        |
|                    | Reverse_end          | CCTTCAGGATCCTTAAAAATCGGTTGAGTTATTTTG      |
|                    | Forward_intermediate | GAACCATGACTTTCCAGGATCGTAATCCAAACTTT<br>G  |
|                    | Reverse_intermediate | CAAAGTTTGGATTACGATCCTGGAAAGTCATGGTT<br>C  |

| <b>Constructs</b>  | <b>Primers</b>       | <b>Sequences</b>                           |
|--------------------|----------------------|--------------------------------------------|
| <b>CsgF (F12D)</b> | Forward_end          | GTGCTGCATATGCGTGTCAAACATGCAGTAGTTC         |
|                    | Reverse_end          | CCTTCAGGATCCTTAAAAATCGGTTGAGTTATTTT<br>G   |
|                    | Forward_intermediate | GTTCCGTAATCCAAACGATGGTGGTAACCCAAAT<br>AATG |
|                    | Reverse_intermediate | CATTATTTGGGTTACCACCATCGTTTGGATTACGG<br>AAC |
| <b>CsgF (F21D)</b> | Forward_end          | GTGCTGCATATGCGTGTCAAACATGCAGTAGTTC         |
|                    | Reverse_end          | CCTTCAGGATCCTTAAAAATCGGTTGAGTTATTTT<br>G   |
|                    | Forward_intermediate | CCAAATAATGGCGCTGATTTATTAATAGCGCTCA<br>G    |
|                    | Reverse_intermediate | CTGAGCGCTATTTAATAAATCAGCGCCATTATTTG<br>G   |
| <b>CsgF (L22D)</b> | Forward_end          | GTGCTGCATATGCGTGTCAAACATGCAGTAGTTC         |
|                    | Reverse_end          | CCTTCAGGATCCTTAAAAATCGGTTGAGTTATTTT<br>G   |
|                    | Forward_intermediate | CCAAATAATGGCGCTTTTGGATTTAAATAGCGCTCA<br>G  |
|                    | Reverse_intermediate | CTGAGCGCTATTTAAATCAAAGCGCCATTATTTG<br>G    |
| <b>CsgF (L23D)</b> | Forward_end          | GTGCTGCATATGCGTGTCAAACATGCAGTAGTTC         |
|                    | Reverse_end          | CCTTCAGGATCCTTAAAAATCGGTTGAGTTATTTT<br>G   |
|                    | Forward_intermediate | CAAATAATGGCGCTTTTTAGATAATAGCGCTCAG<br>GCC  |
|                    | Reverse_intermediate | GGCCTGAGCGCTATTATCTAAAAAAGCGCCATTA<br>TTTG |

**Supplementary Table 2.** CryoEM data collection, refinement and validation statistics.

|                                                           | <b>CsgFG complex<br/>(EMD-0841, 6L7A)</b> | <b>CsgFG-CsgAN<sub>22</sub> complex<br/>(EMD-0842, 6L7C)</b> |
|-----------------------------------------------------------|-------------------------------------------|--------------------------------------------------------------|
| <b>Data Collection</b>                                    |                                           |                                                              |
| <b>Electron microscope</b>                                | <b>Titan Krios</b>                        | <b>Titan Krios</b>                                           |
| <b>Electron detector</b>                                  | <b>K2-Submit camera</b>                   | <b>K2-Submit camera</b>                                      |
| <b>Voltage (kV)</b>                                       | <b>300</b>                                | <b>300</b>                                                   |
| <b>Pixel size</b>                                         | <b>1.32</b>                               | <b>1.32</b>                                                  |
| <b>Defocus range (<math>\mu\text{m}</math>)</b>           | <b>1.3-2.5</b>                            | <b>1.3-2.5</b>                                               |
| <b>Electron dose (<math>\text{e}/\text{\AA}^2</math>)</b> | <b>50</b>                                 | <b>50</b>                                                    |
| <b>Images</b>                                             | <b>1959</b>                               | <b>2430</b>                                                  |
| <b>3D Reconstruction</b>                                  |                                           |                                                              |
| <b>Final particles</b>                                    | <b>372680</b>                             | <b>139702</b>                                                |
| <b>Resolution</b>                                         | <b>3.38</b>                               | <b>3.34</b>                                                  |
| <b>B-factor (<math>\text{\AA}^2</math>)</b>               | <b>-168.8</b>                             | <b>-173.9</b>                                                |
| <b>Model composition</b>                                  |                                           |                                                              |
| <b>Peptide chains</b>                                     | <b>18</b>                                 | <b>27</b>                                                    |
| <b>R.m.s deviations</b>                                   |                                           |                                                              |
| <b>Bonds (<math>\text{\AA}</math>)</b>                    | <b>0.005</b>                              | <b>0.005</b>                                                 |
| <b>Angles (<math>^\circ</math>)</b>                       | <b>0.777</b>                              | <b>0.797</b>                                                 |
| <b>Ramachandran plot</b>                                  |                                           |                                                              |
| <b>Favored (%)</b>                                        | <b>94.93</b>                              | <b>95.73</b>                                                 |
| <b>Outliers (%)</b>                                       | <b>0</b>                                  | <b>0</b>                                                     |
| <b>Validation</b>                                         |                                           |                                                              |
| <b>Molprobity score</b>                                   | <b>1.55</b>                               | <b>1.58</b>                                                  |
| <b>Clash score</b>                                        | <b>4.54</b>                               | <b>3.85</b>                                                  |
| <b>Rotamer outliers (%)</b>                               | <b>0.42</b>                               | <b>1.20</b>                                                  |



## SUPPLEMENTARY FIGURES

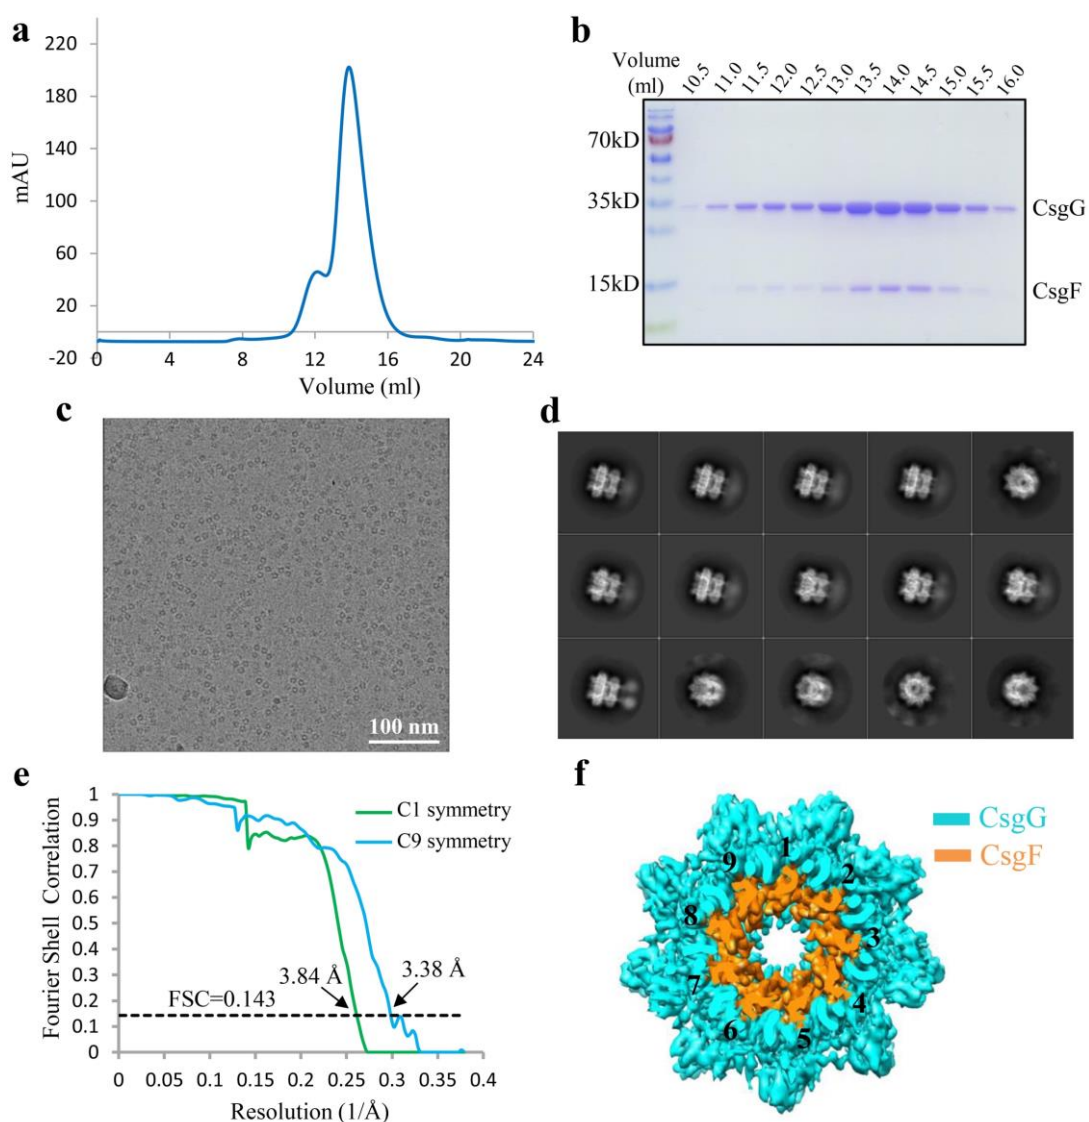

### Supplementary Figure 1. Protein purification and cryoEM analysis of CsgFG.

**a**, Size-exclusion chromatogram of the purified CsgEFG complex. **b**, SDS-PAGE analysis and Coomassie blue staining of the purified CsgEFG complex after size-exclusion chromatography. Source data are provided as a Source Data file. **c**, Representative cryoEM image of the CsgFG complex. Scale bar, 100 nm. **d**, Representative 2D classification of CsgFG complex. **e**, Gold standard Fourier shell correlation (FSC) curves of CsgFG complex reconstructed with C1 symmetry (green) and C9 symmetry (blue). **f**, Top-view of the CsgFG complex with C1 symmetry observed from the extracellular space. CsgG and CsgF are shown in cyan and orange, respectively.

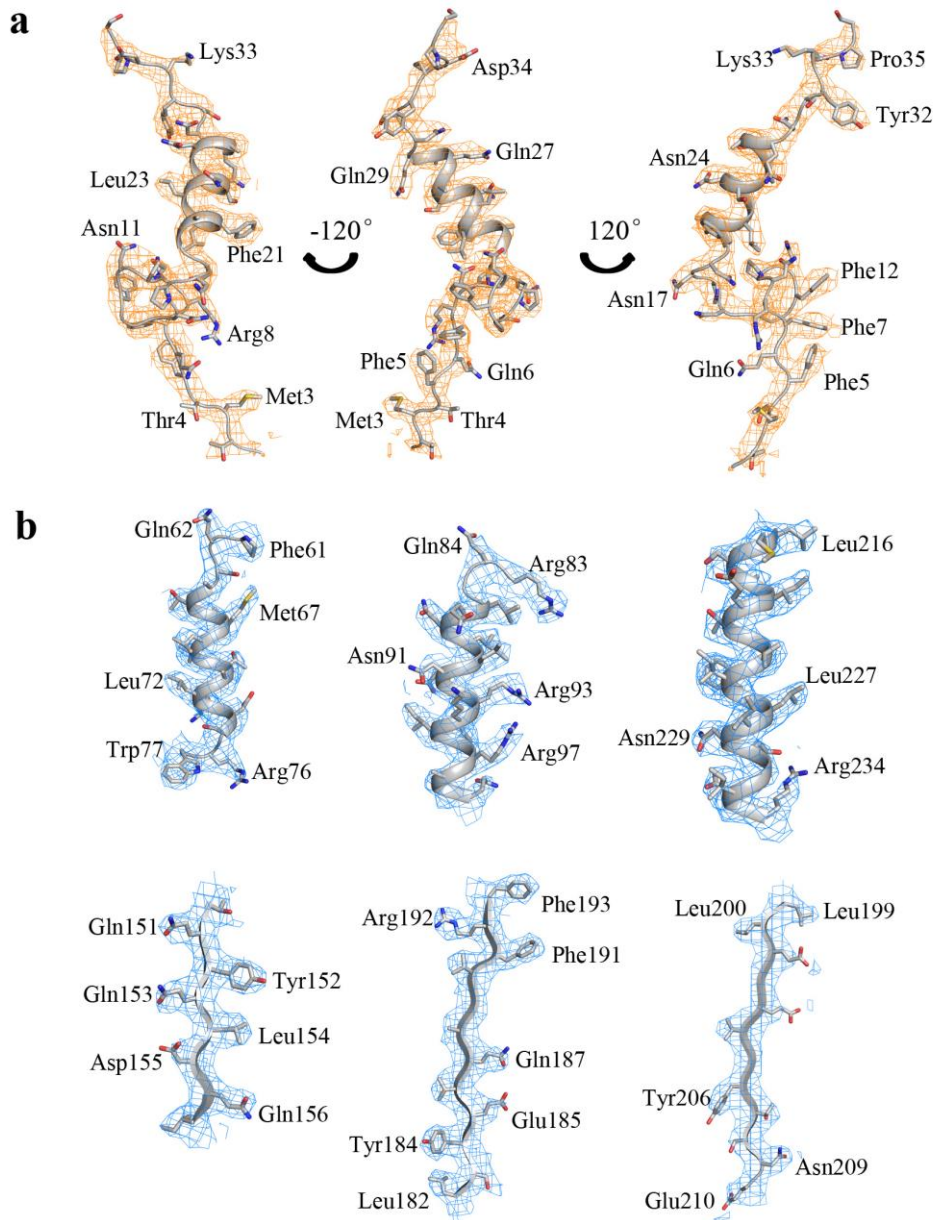

**Supplementary Figure 2. The representative cryoEM densities at different regions of the CsgFG complex.**

**a**, CryoEM density of CsgF<sub>N</sub> shown in different views. **b**, The representative cryoEM densities of CsgG residues with distinct side chains are labelled.

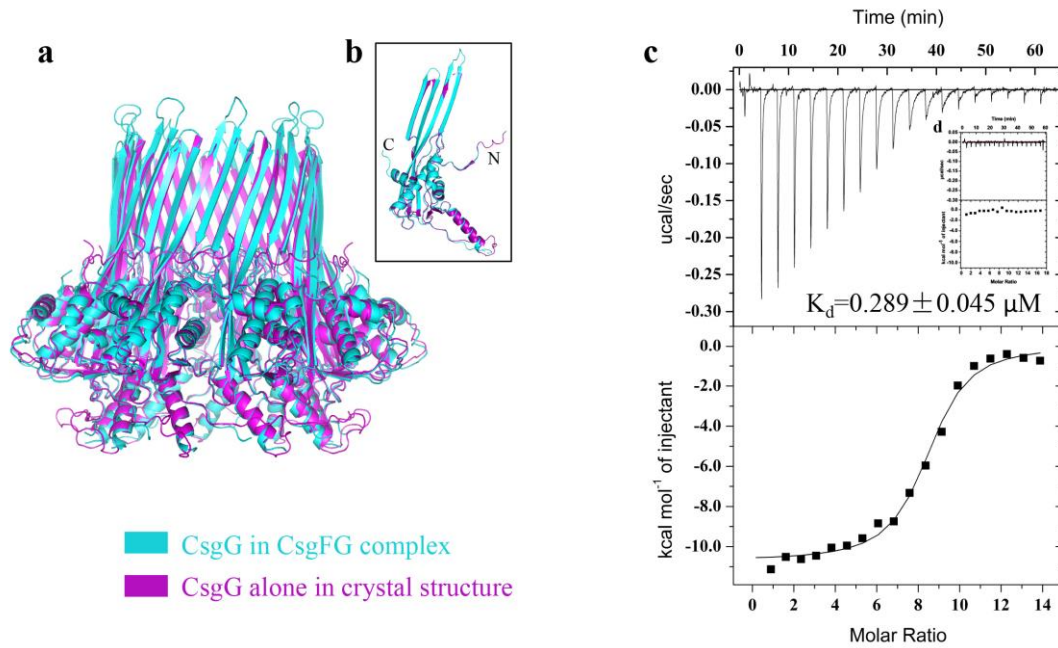

**Supplementary Figure 3. Structural comparison of free CsgG and CsgF-bound CsgG and binding affinity between CsgF<sub>N</sub> and CsgG.**

**a**, Structural comparison of nonamer CsgG in our CsgFG complex (cyan) and CsgG from others (purple, PDB code 4uv3)<sup>1</sup>. Both adopted similar folding patterns with 0.742 Å rmsd and showed no apparent difference. **b**, Structural comparison of monomer CsgG in our CsgFG complex (cyan) and CsgG from others (purple, PDB code 4uv3)<sup>1</sup>. **c**, The ITC profiles of the CsgF<sub>N</sub> (C-terminal MBP tag) and CsgG nonamer. Source data are provided as a Source Data file. **d**, The ITC profiles of MBP and CsgG nonamer.

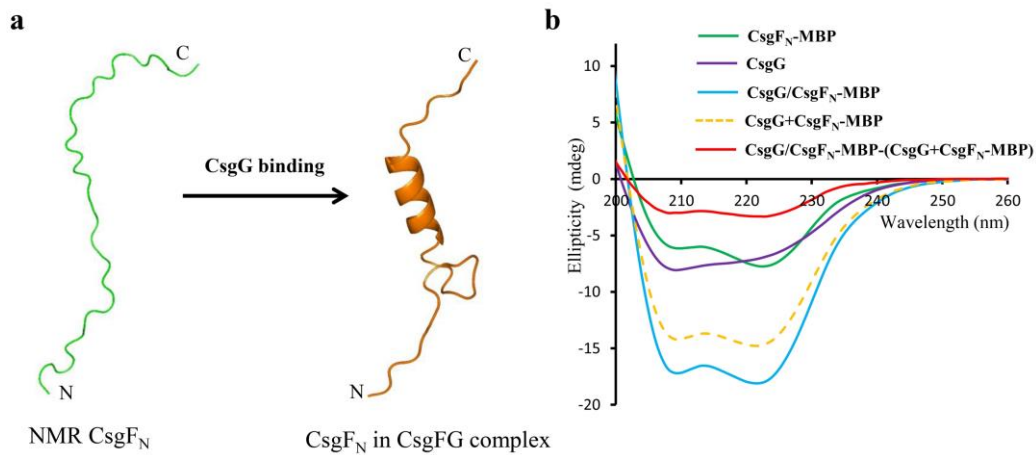

**Supplementary Figure 4. Well folded structure of CsgF<sub>N</sub> in the CsgFG complex.**

**a**, Structural comparison of CsgF<sub>N</sub> between the reported NMR structure<sup>2</sup> and our structure in the CsgFG complex. The N- and C-termini are indicated. **b**, Circular Dichroism (CD) analysis for the CsgF<sub>N</sub> (C-terminal MBP tag) alone (green), CsgG alone (purple) and CsgF<sub>N</sub>-CsgG complex together (blue). The sum of CsgF<sub>N</sub> alone and CsgG alone is shown by the orange dashed line. The difference between the experimental result of the CsgF<sub>N</sub>-CsgG complex and the sum is shown in red, which was consistent with the typical CD spectra of the helix structure.

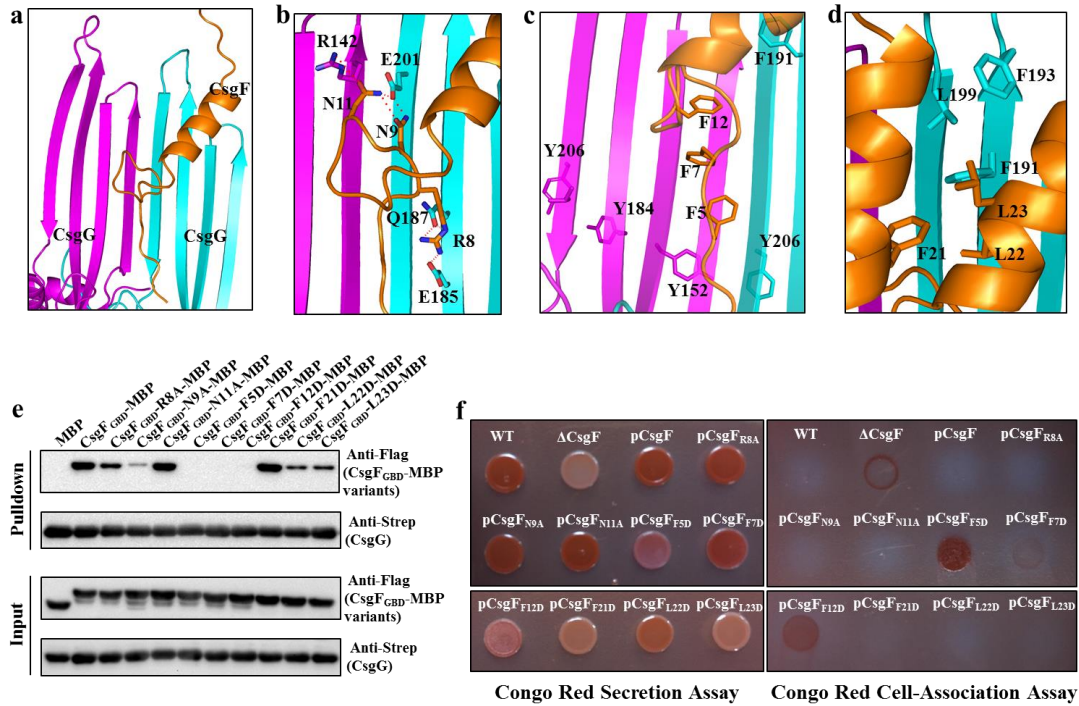

### Supplementary Figure 5. Interaction mode between CsgF<sub>N</sub> and CsgG.

**a**, Interaction of CsgF<sub>N</sub> and CsgG. CsgF<sub>N</sub> is shown in orange. Two adjacent subunits of CsgG are shown in magenta and cyan, respectively. **b**, Hydrogen bonds and electrostatic interaction between CsgF<sub>N</sub> and CsgG. Hydrogen bonds are shown as red dashed lines. **c**, The folding of three aromatic residues in CsgF<sub>N</sub> and some typical aromatic residues in CsgG. **d**, The hydrophobic interaction between CsgF<sub>N</sub> and CsgG. **e**, Pull-down assay between the CsgF(C-terminal MBP tag) mutant variants and CsgG. Source data are provided as a Source Data file. **f**, Congo red secretion assay (left) and corresponding Congo red cell-association assay (right) for the CsgF mutant variants. Source data are provided as a Source Data file.

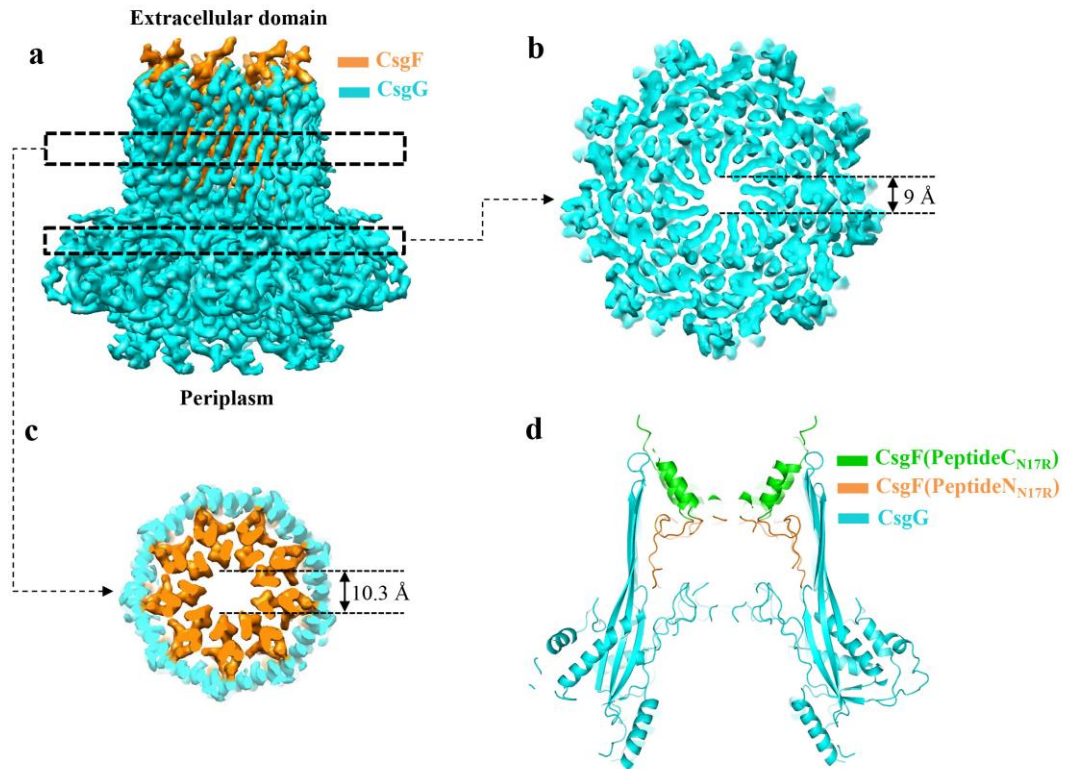

**Supplementary Figure 6. Two-pore structure of the CsgFG complex.**

**a**, Side view of the overall structure of the CsgFG complex. CsgG and CsgF are shown in cyan and orange, respectively. The positions of the two pores are indicated by black rectangles. **b**, Top view of the first pore structure formed by CsgG corresponding to the lower black rectangle in (a). **c**, Top view of the second pore structure formed by CsgF<sub>N</sub> corresponding to the upper black rectangle in (a). **d**, Section view of the two-pore structure of CsgFG complex. Peptide<sub>N<sub>N17R</sub></sub> is shown in orange and Peptide<sub>C<sub>N17R</sub></sub> is shown in green.

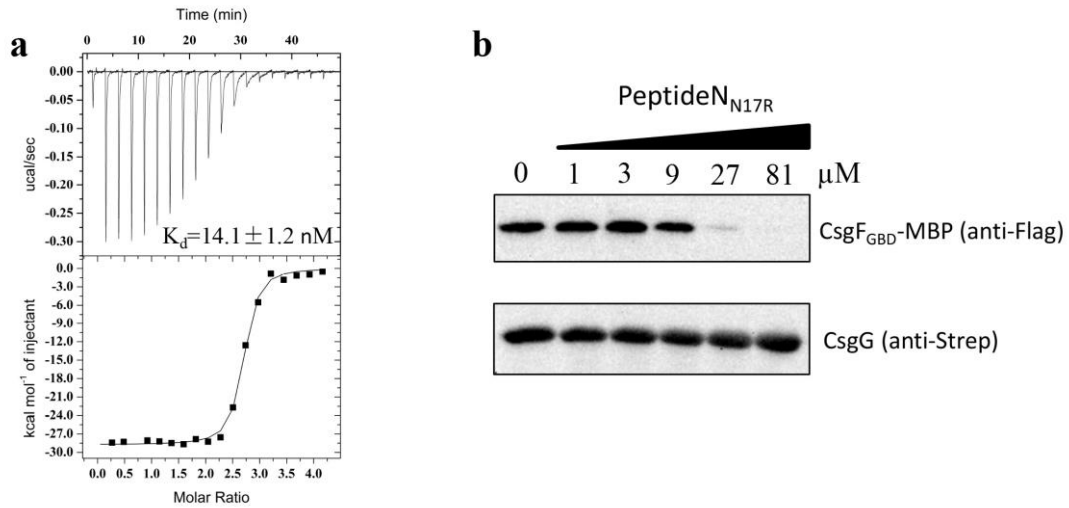

**Supplementary Figure 7. Competitive binding of PeptideN<sub>N17R</sub> and CsgF.**

**a**, The ITC profiles of the PeptideN<sub>N17R</sub> and CsgG nonamer. Source data are provided as a Source Data file. **b**, Competitive binding assay. CsgG is used as a bait to pulldown CsgF<sub>GBD</sub>(C-terminal MBP tag) at different concentrations of PeptideN<sub>N17R</sub>. Source data are provided as a Source Data file.

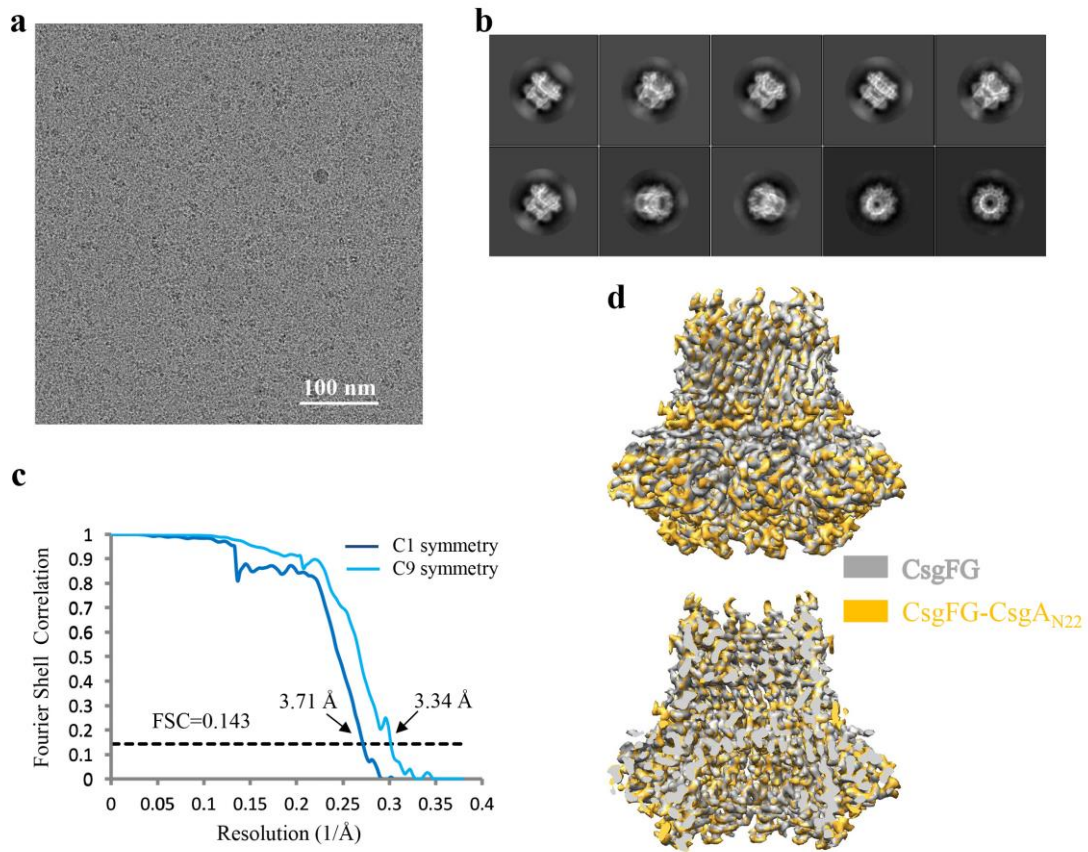

**Supplementary Figure 8. CryoEM data analysis of CsgFG-CsgA<sub>N22</sub> complex.**

**a**, Representative cryoEM image of the CsgFG-CsgA<sub>N22</sub> complex. Scale bar, 100 nm.

**b**, Representative 2D classification of CsgFG-CsgA<sub>N22</sub> complex. **c**, Gold standard FSC curve of the CsgFG-CsgA<sub>N22</sub> complex. **d**, Structural comparison of the overall

CsgFG (grey) and CsgFG-CsgA<sub>N22</sub> (yellow) complexes.



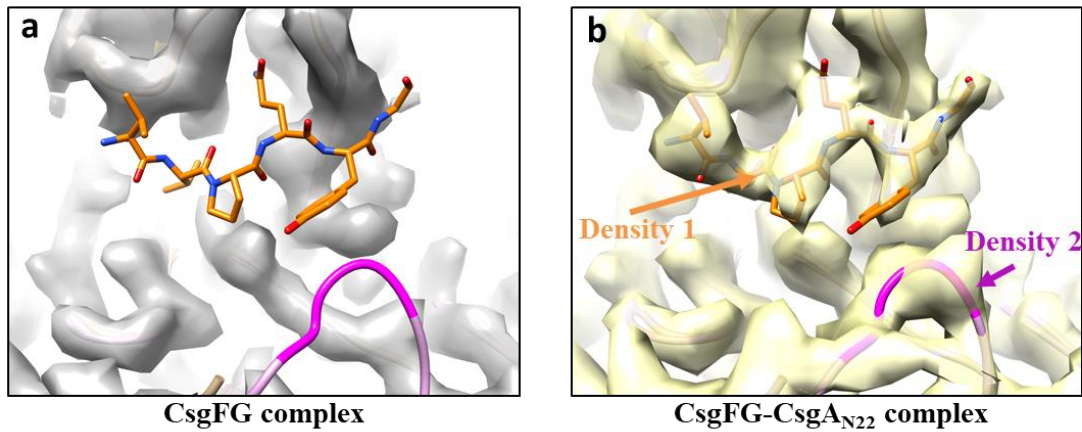

**Supplementary Figure 9. Different cryoEM densities between the CsgFG and CsgFG-CsgAN<sub>22</sub> complexes.**

**a** and **b** are density maps of the CsgFG complex and CsgFG-CsgAN<sub>22</sub> complex, respectively. The model of CsgFG-CsgAN<sub>22</sub> is overlapped with two maps. Two additional densities in **b**, corresponding to CsgA<sub>N6</sub> (orange model) and a CsgG loop region (purple model, residues 107 - 110), are shown and pointed by arrows, respectively.

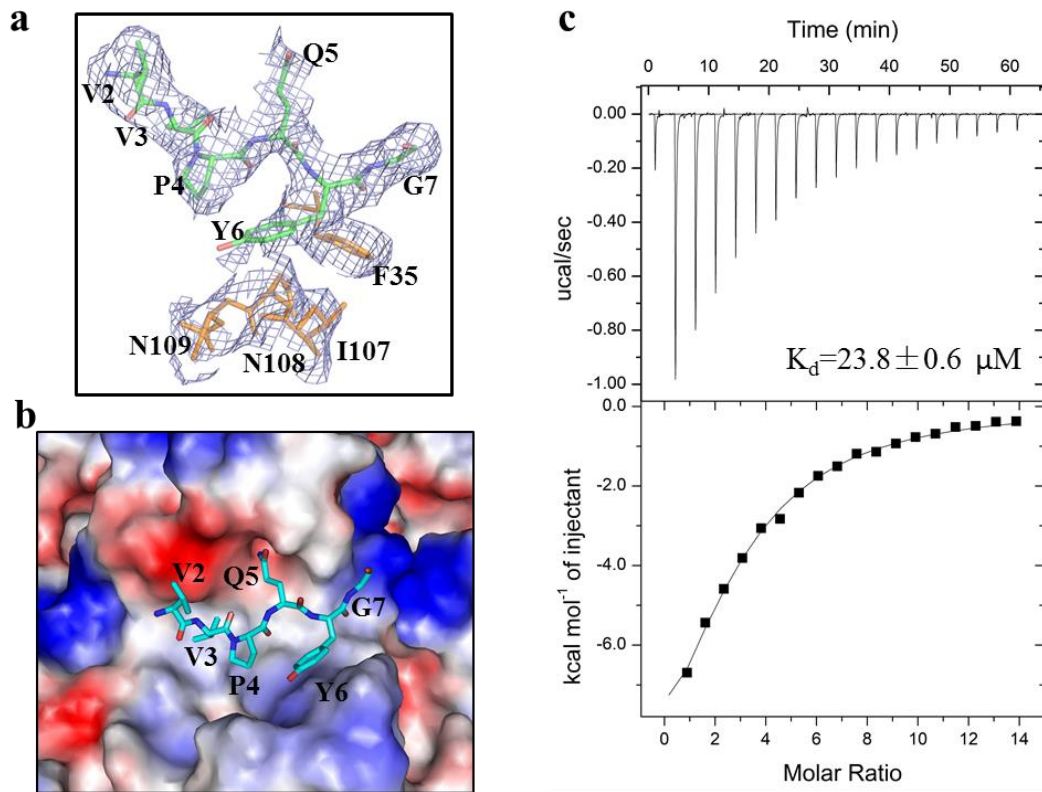

**Supplementary Figure 10. Interaction between CsgA<sub>N22</sub> and the CsgG channel.**

**a**, CryoEM density of six residues of CsgA<sub>N22</sub>. The corresponding model is shown in green chain and fit well into the additional density. A CsgG loop (I107 – N109) and several CsgG residues in background are drawn in orange. **b**, Six residues of CsgA<sub>N22</sub> in the crevice outside the CsgG channel. Electrostatic surface on the background is outside the CsgG periplasmic chamber. **c**, The ITC profiles of CsgA<sub>N6</sub> peptide and CsgG nonamer. Source data are provided as a Source Data file.

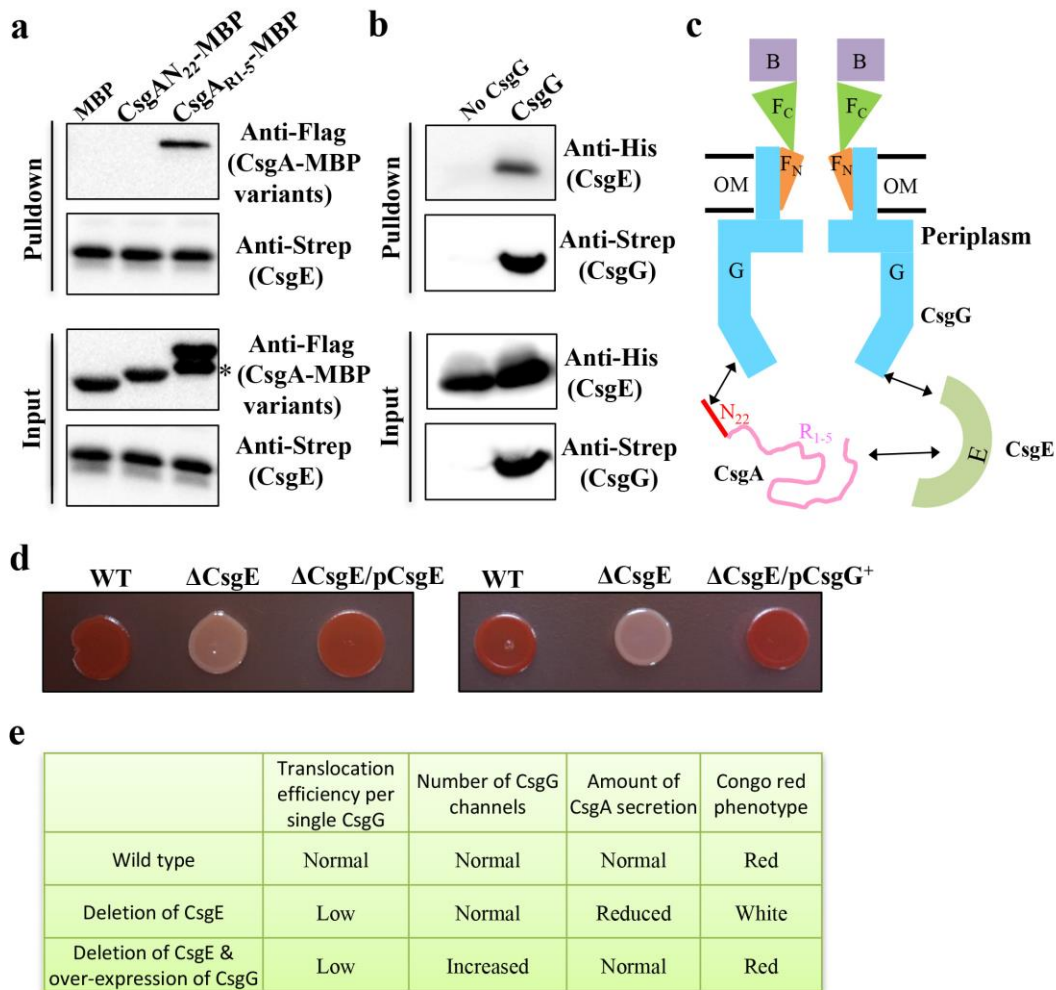

**Supplementary Figure 11. The interactions among CsgG, CsgE and CsgA and efficiency enhancing role of CsgE.**

**a**, Pull-down assay of different parts of CsgA(C-terminal MBP tag) with CsgE. Source data are provided as a Source Data file. **b**, Pull-down assay of CsgE with CsgG. Source data are provided as a Source Data file. **c**, Schematic diagram for the triangular relationship between CsgA, CsgE, and CsgG. Interactions are indicated by black arrows. **d**, Congo red secretion assay of the CsgE deletion and CsgG over-expression in the *E.coli* BW25113  $\Delta$ CsgE strain. Source data are provided as a Source Data file. **e**, Explanation for Congo red phenotype in (**d**). CsgE deletion causes low translocation efficiency per CsgG channel while CsgG over-expression increases the number of CsgG channels.

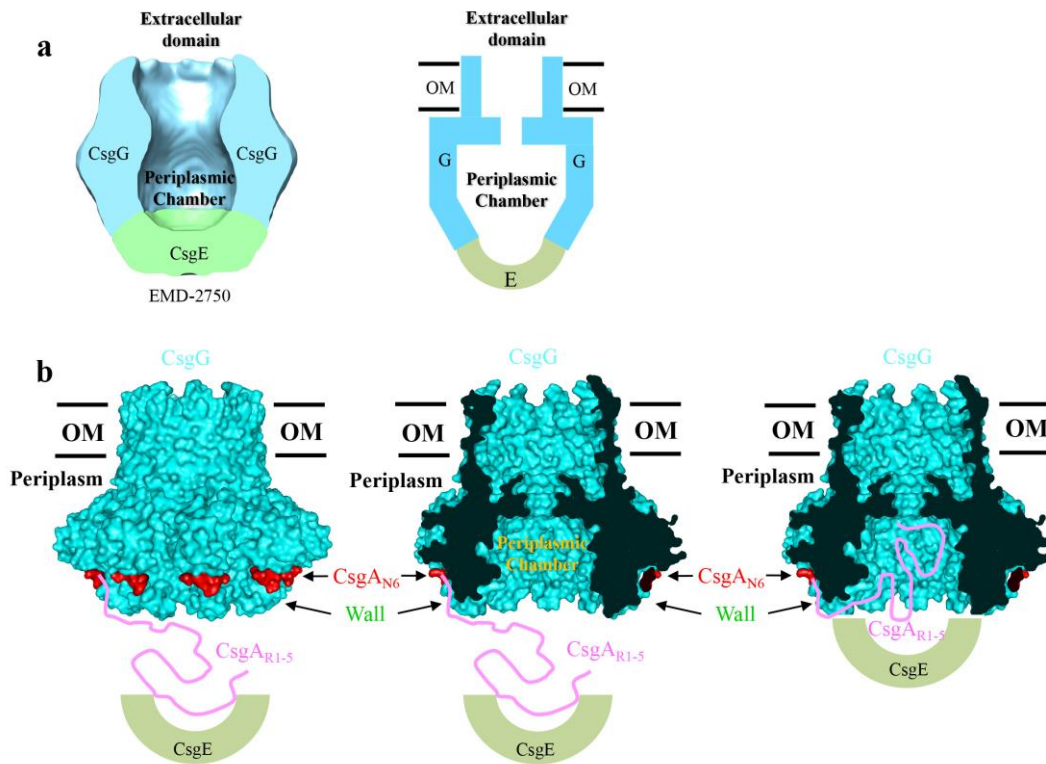

**Supplementary Figure 12. Explanation of efficiency enhancing role of CsgE.**

**a**, Side view of the previously reported cryoEM structure of CsgE-CsgG complex (left)<sup>1</sup> and the corresponding schematic diagram (right). Nine CsgEs form a cap-like structure (green map density) at the entrance to the periplasmic chamber of CsgG. **b**, Surface structure of CsgFG-CsgA<sub>N22</sub> complex and proposed role of CsgE. CsgA<sub>N6</sub> (red densities) is trapped on the crevice of CsgG surface and CsgE interacts with CsgA<sub>R1-5</sub> (left panel). Middle panel is the section view of left panel. CsgA<sub>N6</sub> is located at the back of periplasmic chamber and cannot access the periplasmic chamber. CsgE pushes CsgA<sub>R1-5</sub> into the periplasmic chamber of CsgG through the CsgE-CsgG interaction to enhance the translocation efficiency of CsgA (right panel).

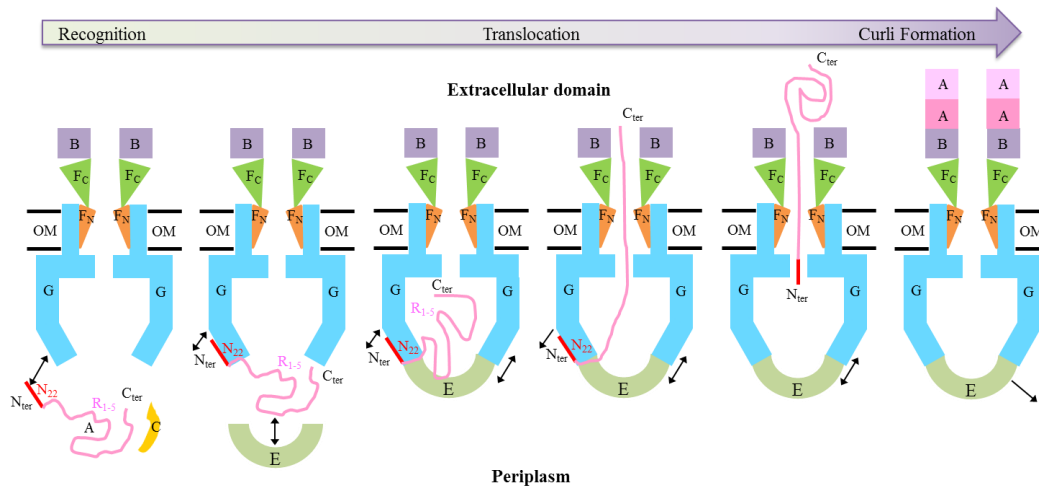

### Supplementary Figure 13. Hypothesized CsgA recognition and secretion model of curli biogenesis system.

The six key steps that are hypothesized to occur during CsgA secretion across the CsgFG channel. First, the N22 sequence of CsgA binds to CsgG for CsgA recognition and enrichment near the CsgG channel. Second, CsgE binds to the R<sub>1-5</sub> repeats of CsgA. Third, CsgE carries CsgA<sub>R1-5</sub> to the large periplasmic chamber of CsgG through CsgE-CsgG interaction. Fourth, C-terminal CsgA is secreted by the pore structures of the CsgFG channel. Fifth, the N-terminus of CsgA dissociates from CsgG to allow further secretion of CsgA. Finally, CsgE dissociates from CsgG to enter into a new secretion cycle. During the progress in the periplasmic space, the chaperon protein CsgC stabilizes the soluble monomer CsgA. OM: outer membrane.

## References

- <sup>1</sup> Goyal, P. *et al.*, Structural and mechanistic insights into the bacterial amyloid secretion channel CsgG. *NATURE* **516** 250 (2014).
- <sup>2</sup> Schubeis, T. *et al.*, Structural and functional characterization of the Curli adaptor protein CsgF. *FEBS LETT* **592** 1020 (2018).
